# Supplementary material for: Secular trends in gabapentinoid dispensing by compensated workers with low back pain: a retrospective cohort study
Source: PubMed Central journal article supplement (PMC11187357; doi:10.1136/oemed-2023-109369), 2024-05-23
Supplement: oemed-2023-109369supp001.pdf [file oemed-2023-109369supp001.pdf]

### Appendix 1 Low back pain classification

VCode is the coding system used to classify the nature of injury/disease associated with claims.

| <i>TOOCS Parameter</i>    | <i>Code</i> | <i>Description</i>                                                           |
|---------------------------|-------------|------------------------------------------------------------------------------|
| Nature of Injury          | 228         | Trauma to muscles and tendons, not elsewhere classified                      |
|                           | 229         | Trauma to muscles and tendons, unspecified                                   |
|                           | 239         | Soft tissue injures due to trauma or unknown mechanisms                      |
|                           | 422         | Disc displacement, prolapse, degeneration or hernia                          |
|                           | 459         | Back pain, lumbago and sciatica                                              |
|                           | 488         | Spinal vertebrae and intervertebral discs diseases, not elsewhere classified |
|                           | 489         | Spinal vertebrae and intervertebral disc diseases, unspecified               |
|                           | 533         | Muscle / tendon strain (non-traumatic)                                       |
| Bodily Location of Injury | 311         | Lower back                                                                   |
| Mechanism of Injury       | Any         | -                                                                            |
| Agency of Injury          | Any         | -                                                                            |

**Table A1:** Definition of low back pain classifications.

## Appendix 2 Gabapentinoid characteristics over time

| Claimant characteristic                                                                                  | Year          |                          |                           |                           |                           |                           |                           |                           |        |
|----------------------------------------------------------------------------------------------------------|---------------|--------------------------|---------------------------|---------------------------|---------------------------|---------------------------|---------------------------|---------------------------|--------|
|                                                                                                          | 2010          | 2011                     | 2012                      | 2013                      | 2014                      | 2015                      | 2016                      | 2017                      | Total  |
| Number of low back claimants (N)                                                                         | 2,368         | 2,245                    | 2,376                     | 2,323                     | 2,130                     | 2,211                     | 2,060                     | 1,976                     | 17,689 |
| Number of low back claimants with at least one gabapentinoid claims (n, % low back claimants)            | 188 (7.9%)    | 222 (9.9%)               | 294 (12.4%)               | 331 (14.2%)               | 334 (15.8%)               | 436 (19.7%)               | 434 (21.1%)               | 369 (18.7%)               | 2,608  |
| Prevalence Ratio (PR) (95%CI; p-value)                                                                   | Ref           | 1.22 (1.04, 1.44; 0.044) | 1.60 (1.37, 1.86; <0.001) | 1.86 (1.60, 2.15; <0.001) | 2.13 (1.84, 2.46; <0.001) | 2.47 (2.15, 2.84; <0.001) | 2.59 (2.26, 2.98; <0.001) | 2.43 (2.11, 2.81; <0.001) | -      |
| Number of gabapentinoid dispenses per claimant among those who were dispensed a gabapentinoid (mean, SD) | 7.0 (7.6)     | 6.0 (6.3)                | 6.7 (7.0)                 | 7.8 (8.9)                 | 7.6 (9.4)                 | 7.7 (8.3)                 | 8.2 (8.7)                 | 7.0 (8.0)                 | -      |
| Days to first gabapentinoid dispensing (mean, SD)                                                        | 311.9 (200.7) | 301.2 (208.7)            | 292.9 (206.5)             | 216.6 (197.0)             | 176.1 (195.4)             | 148.9 (175.7)             | 140.0 (176.5)             | 148.2 (183.1)             | -      |
| Median (IQR) number of gabapentinoid dispenses of those who were dispensed a gabapentinoid               | 4 (1, 10)     | 4 (1, 9)                 | 4 (1, 10)                 | 5 (2, 11)                 | 4 (1, 10)                 | 4 (1, 11)                 | 4 (2, 13)                 | 4 (1, 10)                 | -      |

**Table A2:** Number of gabapentinoid claimants and the number of dispensing and day to dispensing per claimant reported per year.

Abbreviations: CI = Confidence Interval; IQR = Inter-Quartile Range. SD = Standard Deviation.

## Appendix 3 Episodes of gabapentinoid dispensing

| Claimant characteristic                        | Episode of gabapentinoid dispensing <sup>#</sup> |                     |                      |
|------------------------------------------------|--------------------------------------------------|---------------------|----------------------|
|                                                | 1 episode<br>N (%)                               | 2 episodes<br>N (%) | >2 episodes<br>N (%) |
| <b>Whole sample</b>                            | 1,539 (59.0)                                     | 560 (21.5)          | 509 (19.5)           |
| <b>Year</b>                                    |                                                  |                     |                      |
| 2010                                           | 118 (62.8)                                       | 40 (21.3)           | 30 (16.0)            |
| 2011                                           | 134 (60.4)                                       | 60 (27.0)           | 28 (12.6)            |
| 2012                                           | 190 (64.6)                                       | 59 (20.1)           | 45 (15.3)            |
| 2013                                           | 186 (56.2)                                       | 75 (22.7)           | 70 (21.1)            |
| 2014                                           | 187 (56.0)                                       | 66 (19.8)           | 81 (24.3)            |
| 2015                                           | 253 (58.0)                                       | 95 (21.8)           | 88 (20.2)            |
| 2016                                           | 245 (56.5)                                       | 95 (21.9)           | 94 (21.7)            |
| 2017                                           | 226 (61.2)                                       | 70 (19.0)           | 73 (19.8)            |
| <b>Sex</b>                                     |                                                  |                     |                      |
| Female                                         | 533 (60.8)                                       | 192 (21.9)          | 151 (17.2)           |
| Male                                           | 1,006 (58.1)                                     | 368 (21.2)          | 358 (20.7)           |
| <b>Age group</b>                               |                                                  |                     |                      |
| 15-24 years                                    | 70 (66.7)                                        | 20 (19.0)           | 15 (14.3)            |
| 25-34 years                                    | 301 (57.9)                                       | 111 (21.3)          | 108 (20.8)           |
| 35-44 years                                    | 447 (57.5)                                       | 181 (23.3)          | 149 (19.2)           |
| 45-54 years                                    | 461 (60.6)                                       | 153 (20.1)          | 147 (19.3)           |
| 55-64 years                                    | 243 (58.4)                                       | 91 (21.9)           | 82 (19.7)            |
| 65 or more years                               | 17 (58.6)                                        | ^                   | ^                    |
| <b>Employer size</b>                           |                                                  |                     |                      |
| Small                                          | 392 (58.3)                                       | 146 (21.7)          | 134 (19.9)           |
| Medium                                         | 612 (57.8)                                       | 222 (21.0)          | 224 (21.2)           |
| Large                                          | 426 (60.3)                                       | 163 (23.1)          | 117 (16.6)           |
| Government                                     | 61 (61.6)                                        | 15 (15.2)           | 23 (23.2)            |
| Missing (n = 73)                               | 48 (65.8)                                        | 14 (19.2)           | 11 (15.1)            |
| <b>Employment type</b>                         |                                                  |                     |                      |
| Full-time employee                             | 1,090 (58.3)                                     | 409 (21.9)          | 370 (19.8)           |
| Part-time employee                             | 263 (63.1)                                       | 87 (20.9)           | 67 (16.1)            |
| Casual                                         | 27 (57.4)                                        | 6 (12.8)            | 14 (29.8)            |
| Other                                          | 159 (57.8)                                       | 58 (21.1)           | 58 (21.1)            |
| <b>Occupation</b>                              |                                                  |                     |                      |
| Advanced clerical workers                      | 5 (35.7)                                         | ^                   | ^                    |
| Associate professionals                        | 128 (59.5)                                       | 45 (20.9)           | 42 (19.5)            |
| Elementary clerical, sales and service workers | 72 (62.6)                                        | 29 (25.2)           | 14 (12.2)            |

|                                                  |              |            |            |
|--------------------------------------------------|--------------|------------|------------|
| Intermediate clerical, sales and service workers | 185 (60.9)   | 70 (23.0)  | 49 (16.1)  |
| Intermediate production and transport workers    | 327 (58.0)   | 117 (20.7) | 120 (21.3) |
| Labourers and related workers                    | 305 (55.2)   | 128 (23.1) | 120 (21.7) |
| Managers and administrators                      | 66 (68.8)    | 14 (14.6)  | 16 (16.7)  |
| Professionals                                    | 170 (58.6)   | 69 (23.8)  | 51 (17.6)  |
| Tradespersons and related workers                | 281 (61.5)   | 85 (18.6)  | 91 (19.9)  |
| <b>Socioeconomic status</b> (Missing n = 9)      |              |            |            |
| Most advantaged                                  | 229 (64.7)   | 70 (19.8)  | 55 (15.5)  |
| Middle three quintiles                           | 1,030 (59.0) | 367 (21.0) | 350 (20.0) |
| Most disadvantaged                               | 275 (55.2)   | 121 (24.3) | 102 (20.5) |
| <b>Remoteness</b> (Missing n = 5)                |              |            |            |
| Major Cities                                     | 1,065 (57.8) | 400 (21.7) | 376 (20.4) |
| Inner regional                                   | 402 (62.1)   | 139 (21.5) | 106 (16.4) |
| Outer regional and remote                        | 70 (60.9)    | 19 (16.5)  | 26 (22.6)  |
| <b>Medicine use</b>                              |              |            |            |
| Dispensed an opioid analgesic(s)                 | 1,359 (57.5) | 528 (22.3) | 478 (20.2) |
| No opioid dispensed                              | 180 (74.1)   | 32 (13.2)  | 31 (12.8)  |
| Dispensed an anti-depressant(s)                  | 742 (50.6)   | 353 (24.1) | 371 (25.3) |
| No anti-depressant dispensed                     | 797 (69.8)   | 207 (18.1) | 138 (12.1) |

**Table A3:** Proportion and characteristics of gabapentinoid claimants per number of gabapentinoid episodes.

# A new episode of gabapentinoid use was considered if there was more than 60 days between gabapentinoid service claims.

^ Values <5 are suppressed to avoid re-identification.

| <i>Episodes</i> | <i>Workers</i> | <i>Episode type</i>       |                             |                            | <i>Episode duration (days)<sup>3</sup></i> |                     | <i>Time between episodes (days)<sup>4</sup></i> |                     |
|-----------------|----------------|---------------------------|-----------------------------|----------------------------|--------------------------------------------|---------------------|-------------------------------------------------|---------------------|
|                 |                | <i>Single<sup>1</sup></i> | <i>Multiple<sup>2</sup></i> | <i>Single and Multiple</i> | <i>Mean (SD)</i>                           | <i>Median (IQR)</i> | <i>Mean (SD)</i>                                | <i>Median (IQR)</i> |
|                 | <i>N</i>       | <i>N (%)</i>              | <i>N (%)</i>                | <i>N (%)</i>               |                                            |                     |                                                 |                     |
| 1 episode       | 1,539          | 714 (46.4)                | 825 (53.6)                  | - (-)                      | 183.2 (197.9)                              | 90 (42, 279)        | - (-)                                           | - (-)               |
| 2 episodes      | 560            | 96 (17.1)                 | 222 (39.6)                  | 242 (43.2)                 | 152.5 (139.4)                              | 102.5 (49, 219.8)   | 160.5 (130.9)                                   | 98 (71, 198)        |
| >2 episodes     | 509            | 51 (10)                   | 84 (16.5)                   | 374 (73.5)                 | 105.1 (93.3)                               | 69 (41, 140.5)      | 116.4 (75.7)                                    | 89 (71, 133)        |

**Table A4.** N (%) of workers by the type of gabapentinoid episode (single dispense, multiple dispenses, or both), and the duration of gabapentinoid episodes and time between gabapentinoid episodes.

Abbreviations: SD = Standard Deviation; IQR = Inter-Quartile Range.

*Footnotes:*

1: A single gabapentinoid dispensing only.

2: More than one gabapentinoid dispensing.

3: Days between first and last gabapentinoid dispensing in a given episode, excluding single dispenses.

4: Days between episodes where the end of an episode is defined as >60 days between gabapentinoid dispensing.

In summary,

- Most workers have a single episode of gabapentinoid dispensing.
- Workers with a single episode of gabapentinoid dispensing had the longest mean episode duration (183.2 days).
- Workers with only two gabapentinoid episodes had the longest mean duration between episodes (160.5 days).

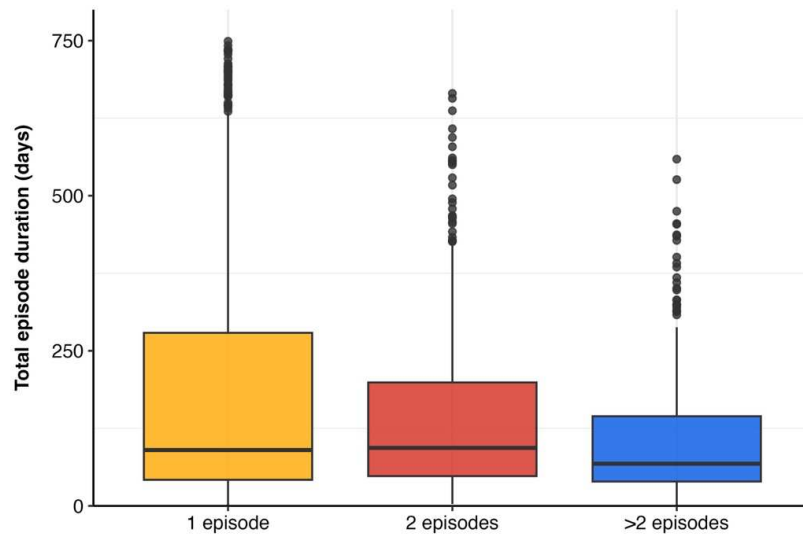

**Figure A1.** Gabapentinoid episode duration in workers who had one, two, or more than two episodes.

#### Appendix 4 Gabapentinoid dispensing relative to dispensing of other pain medicines

Tables A5 and A6 describes the proportion of low back pain (LBP) claimants who received a medicine for pain, and the pain medicine dispensing relative to their first gabapentinoid dispensing. A claimant may have received more than one class of pain medicines during their claim history, in which they are counted once in each drug class. If a claimant received multiple pain medicines within one class, they are only reported once.

| <i>Pain medicine group</i>                                        | <i>All LBP claimants (n = 17,689)</i>                 |                                                           | <i>LBP claimants dispensed a gabapentinoid (n = 2,608)</i>          |                                                                        |
|-------------------------------------------------------------------|-------------------------------------------------------|-----------------------------------------------------------|---------------------------------------------------------------------|------------------------------------------------------------------------|
|                                                                   | <i>Dispensed, at any time during claimant history</i> | <i>Not dispensed, at any time during claimant history</i> | <i>Pain medicine dispensed, at any time during claimant history</i> | <i>No pain medicine dispensed, at any time during claimant history</i> |
|                                                                   | <i>N (row %)</i>                                      | <i>N (row %)</i>                                          | <i>N (row %)</i>                                                    | <i>N (row %)</i>                                                       |
| N02BF – Gabapentinoids                                            | 2,608 (14.7)                                          | 15,081 (85.3)                                             | 2,608 (100.0)                                                       | -                                                                      |
| N02A - Opioids                                                    | 5,541 (31.3)                                          | 12,148 (68.7)                                             | 2,365 (90.7)                                                        | 243 (9.3)                                                              |
| N06A – Anti-depressants                                           | 2,476 (14.0)                                          | 15,213 (86.0)                                             | 1,466 (56.2)                                                        | 1,142 (43.8)                                                           |
| M01A – Anti-inflammatory and antirheumatic products, non-steroids | 4,223 (23.9)                                          | 13,466 (76.1)                                             | 1,809 (69.4)                                                        | 799 (30.6)                                                             |
| M02A - Topical products for joint and muscular pain               | 342 (1.9)                                             | 17,347 (98.1)                                             | 141 (5.4)                                                           | 2,467 (94.6)                                                           |
| N02BE01 - Paracetamol                                             | 2,176 (12.3)                                          | 15,513 (87.7)                                             | 1,074 (41.2)                                                        | 1,534 (58.8)                                                           |

**Table A5.** N (%) of low back pain (LBP) claimants dispensed types of medicines for pain.

| <i>Pain medicine group</i>                                        | <i>Pain medicine dispensed before gabapentinoids<sup>a</sup></i> | <i>Pain medicine dispensed with or after gabapentinoids<sup>b</sup></i> | <i>Total</i>   |
|-------------------------------------------------------------------|------------------------------------------------------------------|-------------------------------------------------------------------------|----------------|
|                                                                   | <i>N (row %)</i>                                                 | <i>N (row %)</i>                                                        | <i>N (row)</i> |
| N02A - Opioids                                                    | 1,592 (67.3)                                                     | 773 (32.7)                                                              | 2,365          |
| N06A – Anti-depressants                                           | 548 (37.4)                                                       | 918 (62.6)                                                              | 1,466          |
| M01A – Anti-inflammatory and antirheumatic products, non-steroids | 1,037 (57.3)                                                     | 772 (42.7)                                                              | 1,809          |
| M02A - Topical products for joint and muscular pain               | 67 (47.5)                                                        | 74 (52.5)                                                               | 141            |
| N02BE01 - Paracetamol                                             | 441 (41.1)                                                       | 633 (58.9)                                                              | 1,074          |

**Table A6.** N (%) of low back pain (LBP) claimants dispensed gabapentinoids (n = 2,608) and another medicine for pain in relation to their first gabapentinoid dispensing.

*a: The first time pain medicine(s) were dispensed was before the first date of gabapentinoid dispensing.*

*b: The first time pain medicine(s) were dispensed was on or after the first date of gabapentinoid dispensing.*

In summary

- Very few workers dispensed (or at least claimed) topical products or paracetamol.
- Most (90.7%) workers ever dispensed gabapentinoids also had opioid analgesic dispensing in this claim, of which two thirds (n = 1,592) were dispensed an opioid analgesic(s) before the gabapentinoid.
